# Supplementary material
Source: PubMed Central journal article supplement (PMC5088636)
Supplement: supp_dew231_dew231supp_table1.pdf [file supp_dew231_dew231supp_table1.pdf]

**Supplementary Table S1** Characteristics of sample.

|                                       | Male | Female | Total |
|---------------------------------------|------|--------|-------|
| <i>Physicians</i>                     | 14   | 3      | 17    |
| Physicians who are also patients      | 0    | 1      | 1     |
| <i>Type of practice</i>               |      |        |       |
| University affiliated                 | 5    | 1      | 6     |
| Private practice                      | 9    | 2      | 11    |
| <i>OTHER ART providers</i>            |      |        |       |
| E.g., mental health providers, nurses | 1    | 9      | 10    |
| Other providers who are also patients | 0    | 3      | 3     |
| Patients                              | 1    | 9      | 10    |
| Total                                 | 16   | 21     | 37    |
